# Supplementary material
Source: publisher figshare collection journal article supplement (https://springernature.figshare.com/ndownloader/files/13309583)

**Additional file 2: Figure S1.** a The expression levels of circYAP1 in GC patients with TS  $\geq 5$  cm or  $< 5$  cm. b Receiver operating characteristic (ROC) curve analysis of the cutoff value, sensitivity, specificity and AUC of circYAP1 in GC patients. c-f Flow cytometry was used to detect the proportion of apoptotic cells in circYAP1-overexpression-transfected MKN-45 cells.

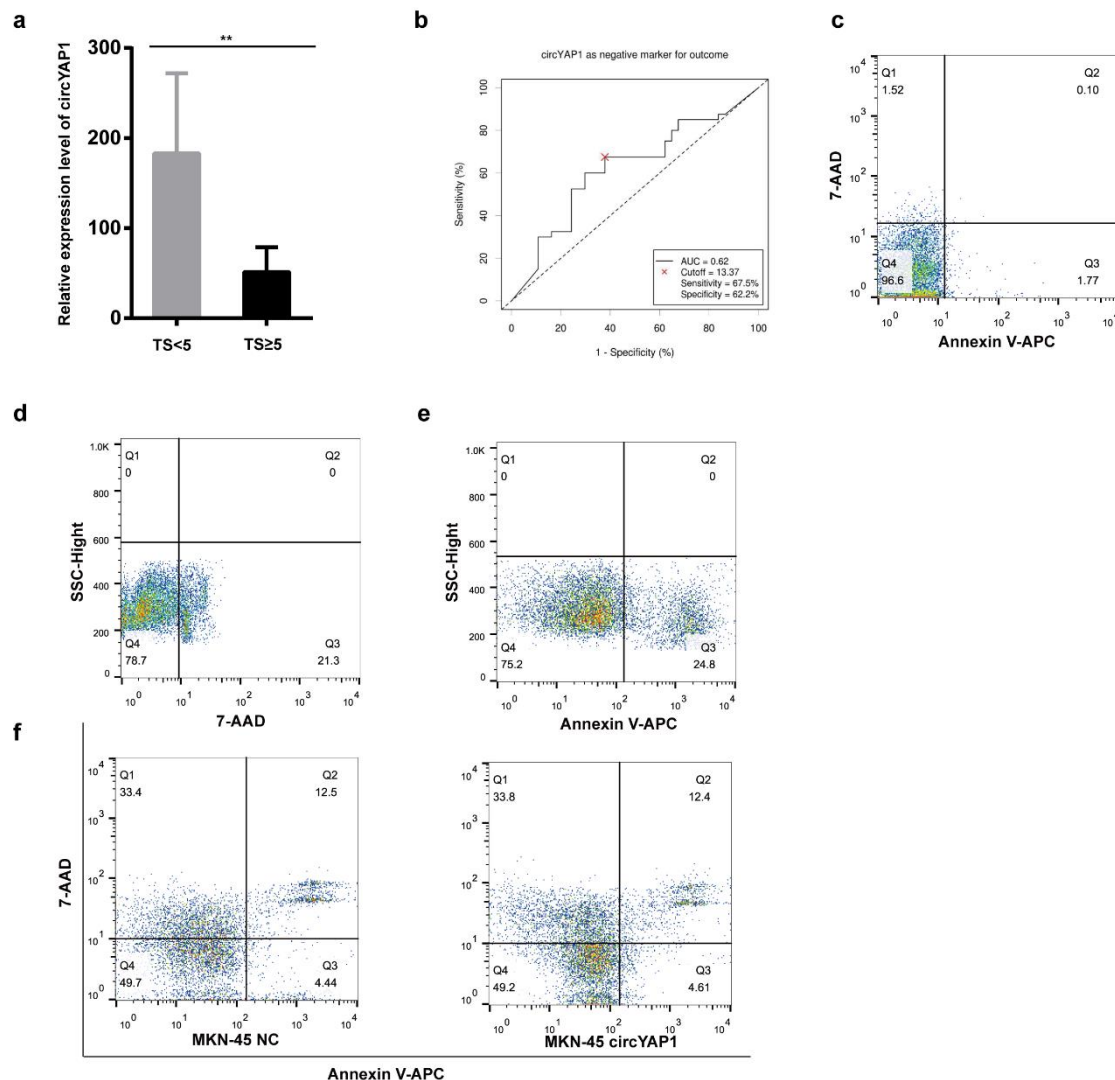

Supplement: Supplementary file [file 13309583]
